# Supplementary material
Source: ML conference proceedings conference paper supplement (https://www.ecva.net/papers/eccv_2022/papers_ECCV/html/136820503_ECCV_2022_paper.php)
Supplement: Supplementary file 2 [file 136820503-supp.zip › 4961-supp/supp_video_link.txt]

Go to the link below to see the supplemenatry video of our work.

https://vcai.mpi-inf.mpg.de/projects/HULC/
